# Supplementary material for: Topography induced stiffness alteration of stem cells influences osteogenic differentiation
Source: Royal Society of Chemistry journal article supplement (doi:10.1039/d0bm00264j), 2020-01-01
Supplement: d0bm00264j1.pdf [file d0bm00264j1.pdf]

## Supporting information

### **Topography induced stiffness alteration of stem cells influences osteogenic differentiation**

Liangliang Yang<sup>ab†</sup>, Qi Gao<sup>c†</sup>, Lu Ge<sup>ab</sup>, Qihui Zhou<sup>d</sup>, Eliza M. Warszawik<sup>ab</sup>, Reinier Bron<sup>ab</sup>, King Wai Chiu Lai<sup>c\*</sup>, and Patrick van Rijn<sup>ab\*</sup>

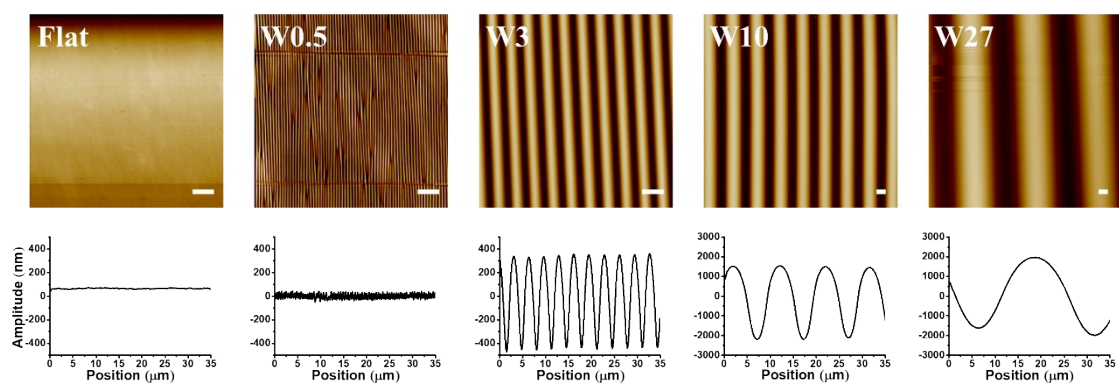

**Fig. S1** AFM images taken from side part of substrate and height profiles of the structured PDMS surfaces obtained after imprinting. Scale bar is 4  $\mu\text{m}$  and applies to all images.

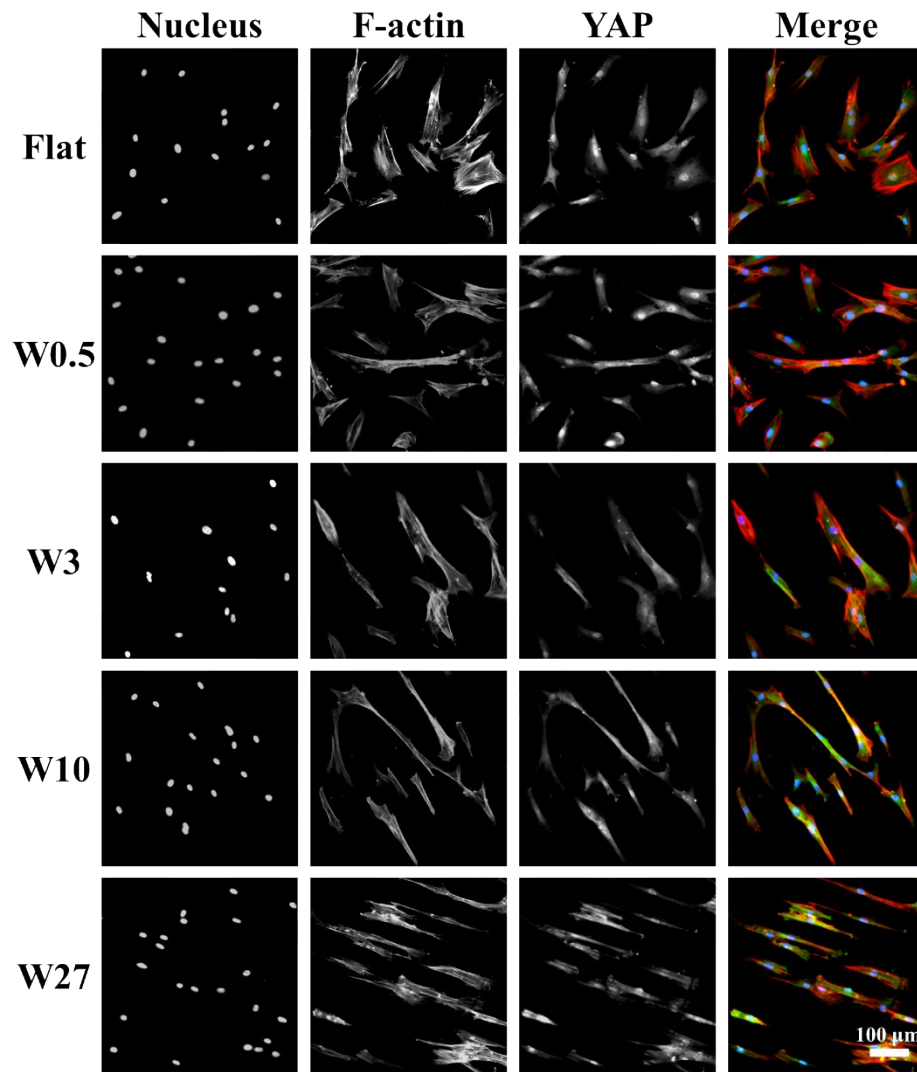

**Fig. S2 (A)** Representative images of YAP localization in hBM-MSCs seeded onto different surfaces for 24 hours.
